# Supplementary material for: Continuous flexibility analysis of SARS-CoV-2 Spike prefusion structures
Source: PubMed Central journal article supplement — bioRxiv. 2020 Jul 8:2020.07.08.191072. Preprint. [Version 1] doi: 10.1101/2020.07.08.191072 (PMC7359526; doi:10.1101/2020.07.08.191072), 2020-07-08
Supplement: NIHPP2020.07.08.191072-f0004-supplement-1.pdf [file NIHPP2020.07.08.191072-f0004-supplement-1.pdf]

## Supplementary Material

**Supplementary Material Figure 1.** Graphical representation of the processing workflow in Scipion. The workflow is also accessible at Scipion Workflow Repository at <http://workflows.scipion.i2pc.es/>.

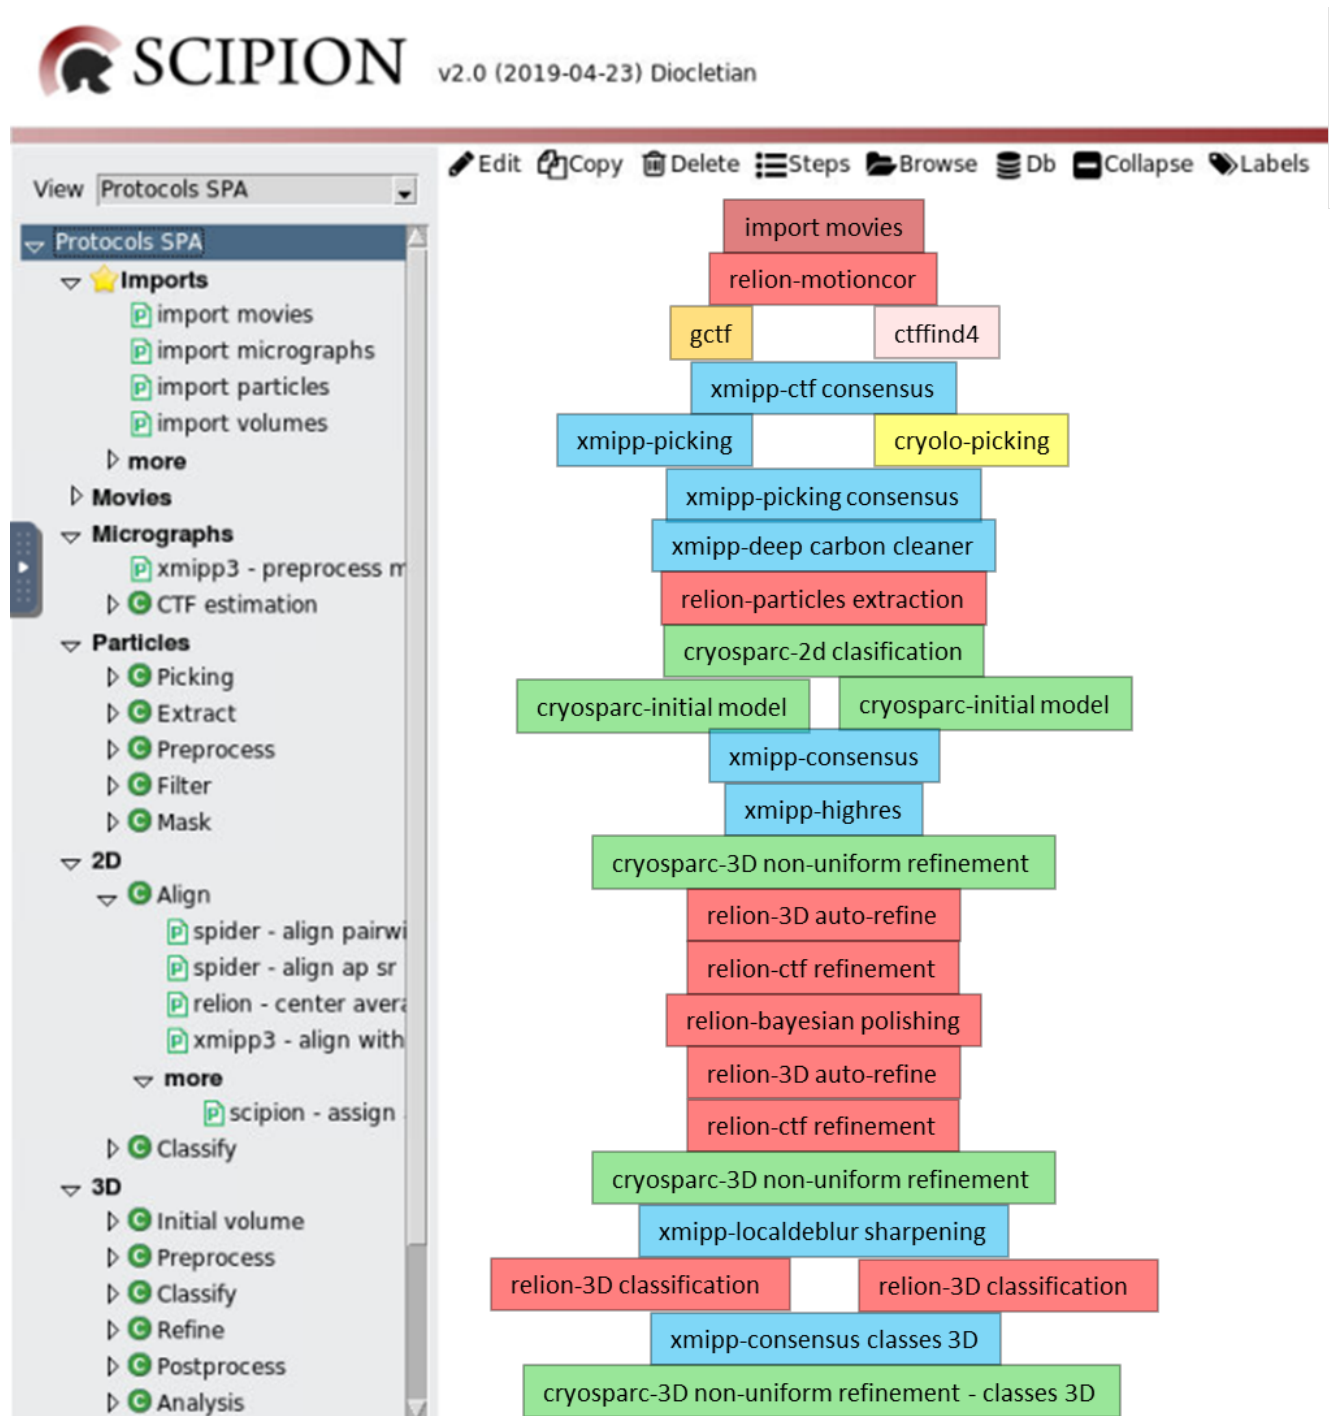

**Supplementary Material Figure SM2.** Comparison of the ability to trace the atomic structure between the original cryo-EM map (EMD-21375) and the two sharpened maps derived from the new reconstructed ensemble map. Six representative 3D map areas (a-f) illustrate the fitting between map and atomic structure. The red arrows detail aminoacid side chains fitted to better defined densities in the sharpened map compared to the original map. These side chains could have been modeled (a, b, d, e) or being absent (c, f) in the original map. The green arrows indicate other additional residues whose side chains have been modeled only in the sharpened maps, while they were absent in the original one. The blue arrows point at densities that make it difficult to follow the carbon skeleton shape or discriminate among different chains in the original map, whereas they appear better resolved in the sharpened maps.

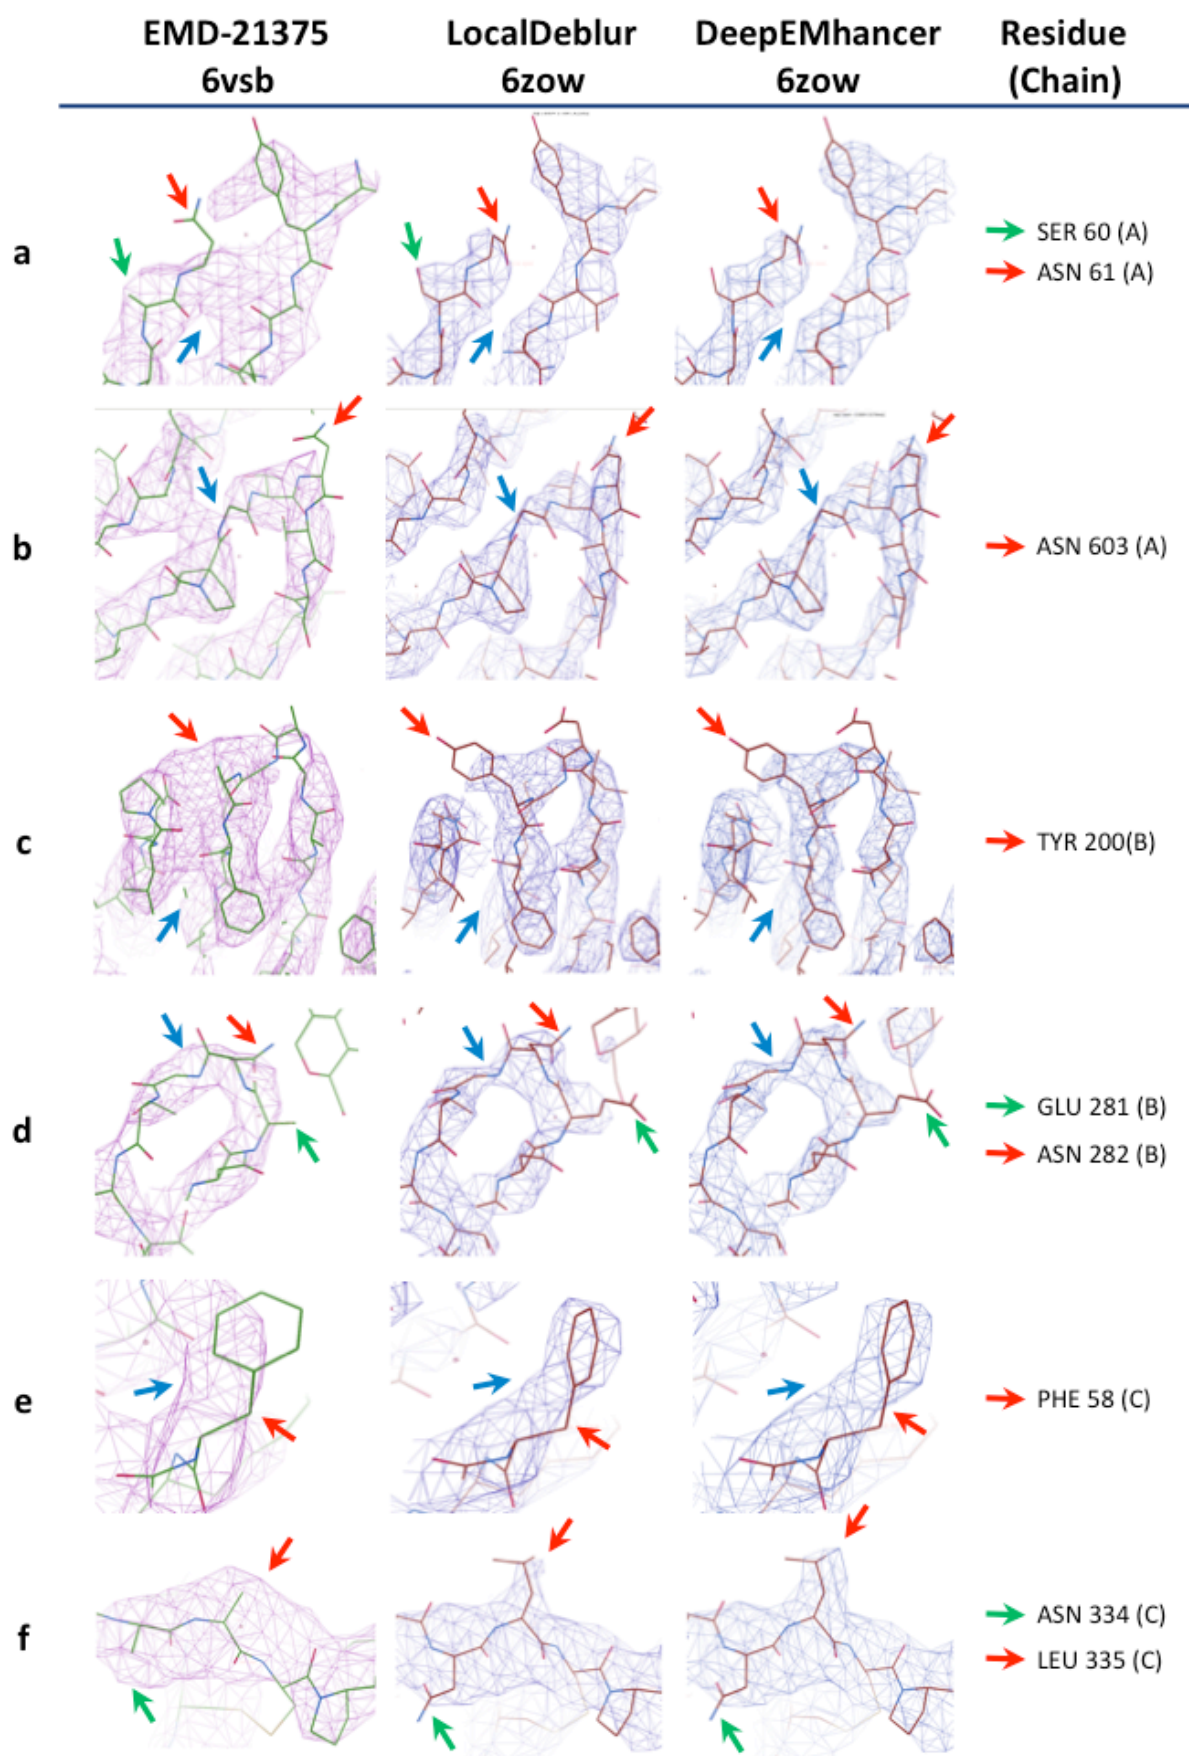

**Supplementary Material Figure SM3.** Map-to-Model quality measures for the ensemble map. A) Q-score values represented on each amino acid of the new ensemble atomic model. Q-scores close to 1 indicate better resolvability of the residue. B) FSC-Q values are represented for each residue. Values close to zero indicate a good map-to-model fit, while values far from zero indicate areas where the model loses support with respect to the map signal.

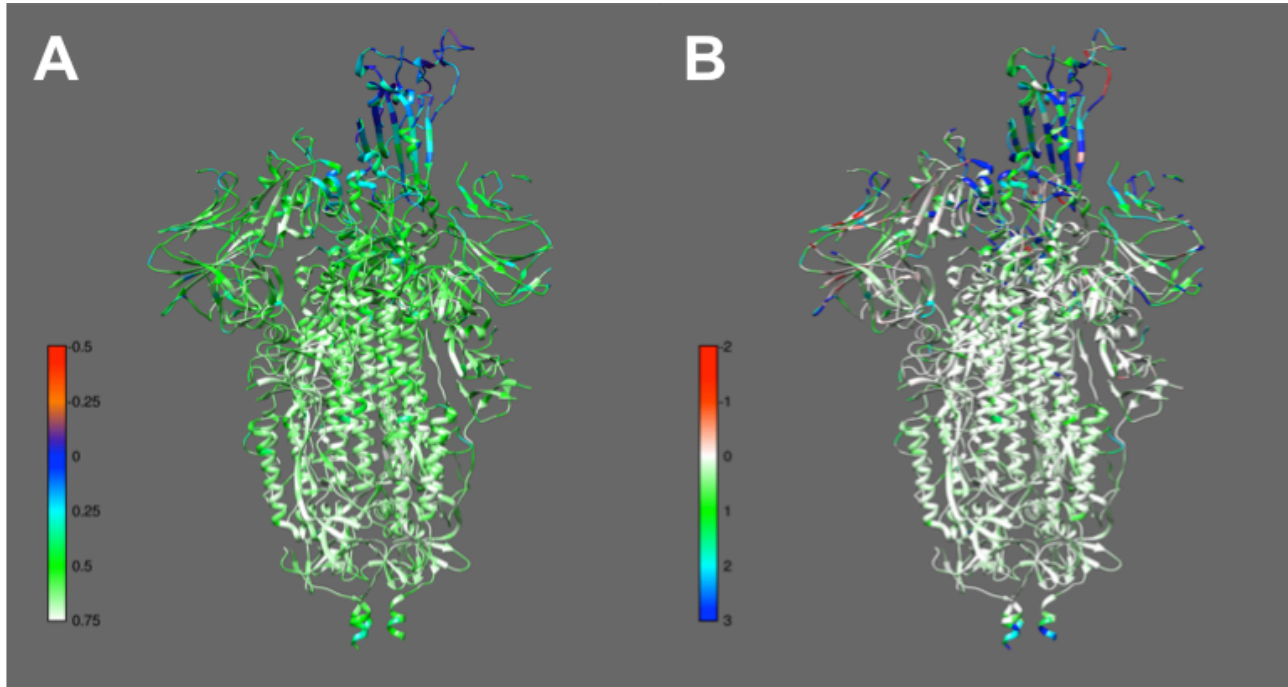

**Supplementary Material Figure SM4.** Principal Component Analysis. Side and top views of mean volume  $\pm 2$  std for the three principal components. Coloring indicates z-depth of the structure, and is added to assist visualization of the top view.

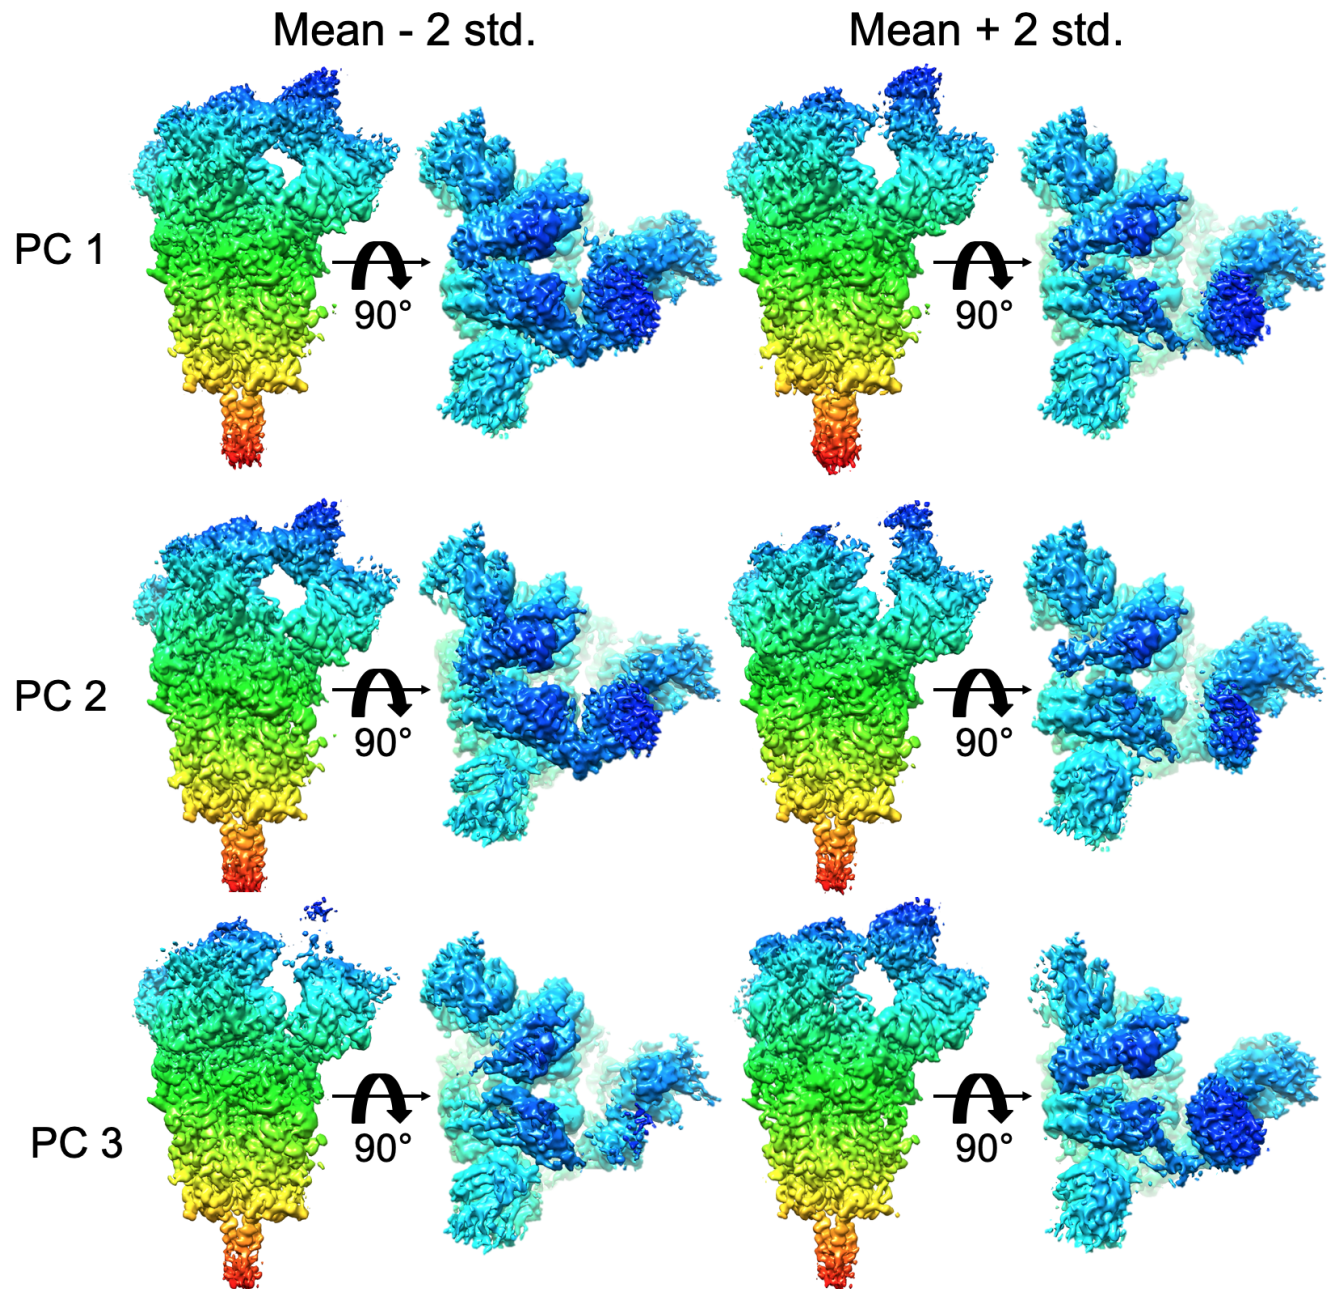

**Supplementary Material Figure SM5.** Principal Component Analysis. Enlarged top half of the side views showing details of the density changes captured by the principal components. Coloring indicates z-depth of the structure, and is added to assist visualization of the top view.

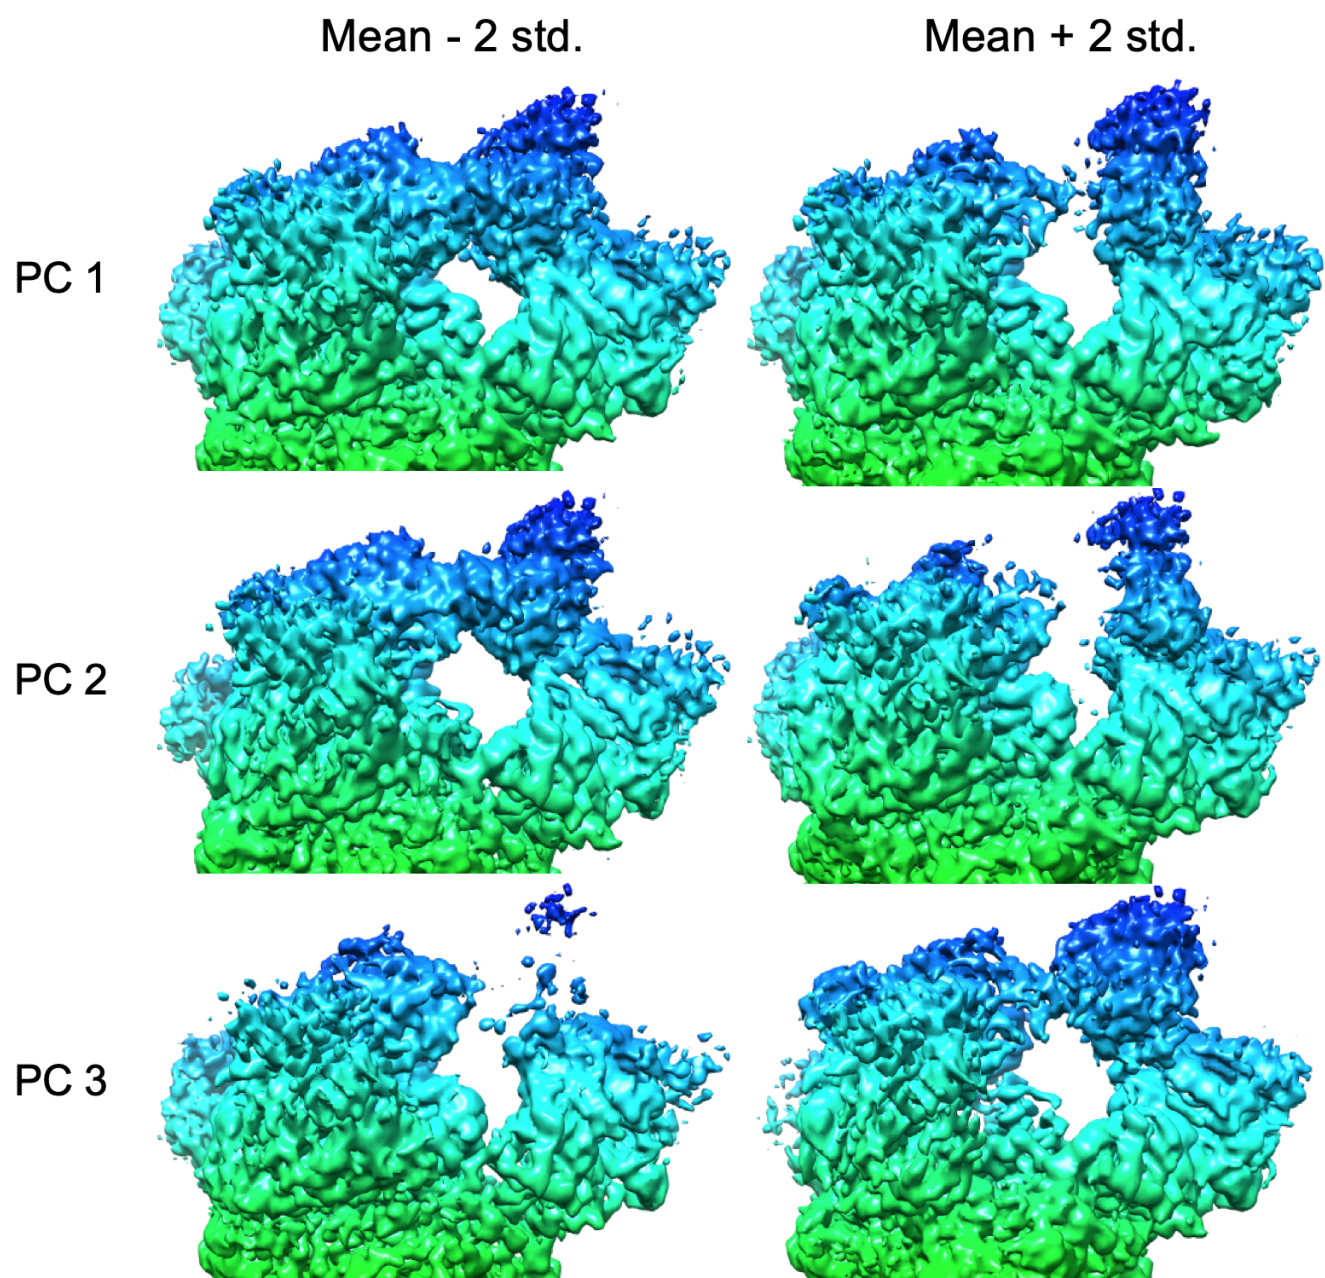

**Supplementary Table SM1.** Validation scores of the new atomic structure PDB 6ZOW

| <b>Validation scores</b>             | <b>Whole structure<sup>1</sup></b> | <b>Modeled structure<sup>2</sup></b> |
|--------------------------------------|------------------------------------|--------------------------------------|
| EMRinger                             | 2.66                               | 2.73                                 |
| CC(mask)                             | 0.75                               | 0.76                                 |
| Ramachandran outliers (Goal: < 0.2%) | 0.00                               | 0.00                                 |
| Ramachandran favored (Goal: > 98%)   | 97.06                              | 97.28                                |
| Rotamer outliers (Goal: < 1%)        | 0.52                               | 0.17                                 |
| C-beta outliers                      | 0                                  | 0                                    |
| Clashscore                           | 12.06                              | 12.43                                |
| MolProbity overall score             | 1.76                               | 1.74                                 |
| Q-Score                              | 0.55                               | 0.58                                 |
| FSC-Q                                | 0.73                               | 0.58                                 |

<sup>1</sup> Chains A, a, B, C

<sup>2</sup> Excluding the chain a (RBD, added by rigid fitting)

**Supplementary Table SM2.** Number of sequons and size of their respective glycan chains.

| Subunit      | Size of N-linked glycan chain | 6VSB              |                   | 6ZOW              |                   |
|--------------|-------------------------------|-------------------|-------------------|-------------------|-------------------|
|              |                               | Number of sequons | Number of glycans | Number of sequons | Number of glycans |
| S1           | 1                             | 26                | 26                | 18                | 18                |
|              | 2                             | 0                 | 0                 | 7                 | 14                |
|              | 3                             | 0                 | 0                 | 2                 | 6                 |
|              | <b>Subtotal</b>               | <b>26</b>         | <b>26</b>         | <b>27</b>         | <b>38</b>         |
| S2           | 1                             | 1                 | 1                 | 0                 | 0                 |
|              | 2                             | 17                | 34                | 9                 | 18                |
|              | 3                             | 0                 | 0                 | 5                 | 15                |
|              | 4                             | 0                 | 0                 | 2                 | 8                 |
|              | 5                             | 0                 | 0                 | 2                 | 10                |
|              | <b>Subtotal</b>               | <b>18</b>         | <b>35</b>         | <b>18</b>         | <b>51</b>         |
| <b>TOTAL</b> |                               | <b>44</b>         | <b>61</b>         | <b>45</b>         | <b>89</b>         |



**Supplementary Material Movie 1.** Movie presenting the morphing between the two algorithmically stable classes described in the main text, spanning Principal Component Axis 1.
